# Supplementary material for: Genomic Divergence Characterization and Quantitative Proteomics Exploration of Type 4 Porcine Astrovirus
Source: MDPI journal article supplement (doi:10.3390/v14071383), 2022-06-24
Supplement: s1 [file s1]

**Table S1.** The PCR primers for detection of porcine astrovirus.

| Name    | Primer Sequences (5'-3') | Length (bp) |
|---------|--------------------------|-------------|
| PAstV-F | GGATTTACAGTTGGCCCAGAT    | 249         |
| PAstV-R | CCTGTCCATCTGCCTTTCTGT    |             |

**Table S2.** The primers for PCR amplification of the complete genome of PAstV/SH/2022/CM1 strain.

| Name | Primer Sequences          | Location (nt) | Length (bp) |
|------|---------------------------|---------------|-------------|
| T1-R | TAAGTGMTGYTGCAATTGG       | 985–1003      | 1480        |
| T2-F | TTATCTDGCAGCRGCMTCYTT     | 867–887       |             |
| T2-R | CGTTYTGRTAGTAAGATGGTAT    | 2326–2347     |             |
| T3-F | GAAGGGTAAGACCAAGCATGGC    | 2045–2066     | 1034        |
| T3-R | ATTGCTGAAAAGGCAGACACATAGG | 3055–3079     |             |
| T4-F | TTGATTCAACACCRGCTTAT      | 2974–2993     | 1950        |
| T4-R | CACCAGGTTTKGAATRDATTTT    | 4903–4924     |             |
| T5-F | GGACCWAAGGAKGGYTGGTWT     | 4666–4686     | 1666        |
| T5-R | GCATAATCATCATCATCCAART    | 6311–6332     |             |
| T6-F | CCAGGAATTRGGTTGARTTTG     | 6221–6241     |             |
